# Supplementary material for: Regulating the preparation of antibacterial poly(amidoxime) for efficient uranium extraction from seawater
Source: Royal Society of Chemistry journal article supplement (doi:10.1039/d3lp00060e), 2023-01-01
Supplement: d3lp00060e1.pdf [file d3lp00060e1.pdf]

1 **Supporting information for**

2 **Regulating preparation of antibacterial poly(amidoxime) for efficient uranium**  
3 **extraction from seawater**

4 Xue Zhang, Dadong Shao\*

5 School of Environmental and Biological Engineering, Nanjing University of Science  
6 and Technology, Nanjing 210094, P. R. China.

7 *Corresponding author. E-mail addresses: E-mail: shaodadong@126.com (D Shao).*

8 **Supplemental Information, 9 Pages**

9 **List of Supplemental Information Contents**

10 **Table S1.** Curve fitting results of XPS C 1s spectra.....P4

11 **Table S2.** Curve fitting results of XPS N 1s spectra.....P4

12 **Table S3.** Curve fitting results of XPS O 1s spectra.....P4

13 **Table S4.** Parameters for kinetic models of U(VI) adsorption on PAO and  
14  $K_2FeO_4@PAO$  at pH  $8.2 \pm 0.1$  and  $T = 298 \pm 1$  K.....P5

15 **Table S5.** Parameters calculated from Langmuir and Freundlich models for U(VI)  
16 adsorption on PAO and  $K_2FeO_4@PAO$  at pH  $8.2 \pm 0.1$ . .....P5

17 **Table S6.** Thermodynamic parameters for U(VI) adsorption on PAO and  
18  $K_2FeO_4@PAO$  at pH  $8.2 \pm 0.1$ . .....P5

19 **Fig. S1.** SEM images of PAO in methanol/water (A), PAO in  $H_2O$  (B),  
20  $K_2FeO_4@PAO$  in  $H_2O$   
21 (C).....P6

22 **Fig. S2.** Effect of used PAN (A) and  $K_2FeO_4$  (B) amounts on the adsorption  
23 performance of  $K_2FeO_4@PAO$  for U(VI).....P6

24 **Fig. S3.** Comparison of the Tyndall phenomenon of PAO and  
25  $K_2FeO_4@PAO$ .....P7

26 **Fig. S4.** XPS Fe 2p of  $K_2FeO_4@PAO$ .....P7

27 **Fig. S5.** XPS U 4f of PAO and  $K_2FeO_4@PAO$ .....P8

28 **Fig. S6.** Effect of solvents on the desorption of U(VI) from  
29  $K_2FeO_4@PAO$ .....P8

30 **Fig. S7.** The change colonies of *E. coli* and *V. alginolyticus* on agar plates at different  
31 conditions.....P9

32 **Table S1.** Curve fitting results of XPS C 1s spectra.

|                                      | Peak                            | BE <sup>a</sup> (eV) | FWHM <sup>b</sup> (eV) | %    |
|--------------------------------------|---------------------------------|----------------------|------------------------|------|
| PAO                                  | -C≡N                            | 284.56               | 0.78                   | 44.5 |
|                                      | C-C                             | 285.24               | 0.80                   | 31.7 |
|                                      | C-OH                            | 286.34               | 1.03                   | 15.4 |
|                                      | -C=O                            | 287.30               | 1.20                   | 5.70 |
|                                      | -C(NH <sub>2</sub> )=NOH, -COOH | 288.63               | 1.09                   | 3.30 |
| K <sub>2</sub> FeO <sub>4</sub> @PAO | -C≡N                            | 284.55               | 0.76                   | 44.2 |
|                                      | C-C                             | 285.31               | 0.73                   | 27.5 |
|                                      | C-OH                            | 286.34               | 0.96                   | 25.1 |
|                                      | -C=O                            | 287.50               | 0.97                   | 11.6 |
|                                      | -C(NH <sub>2</sub> )=NOH, -COOH | 288.58               | 0.50                   | 2.60 |

33 a: Binding energy; b: Full width at half-maximum.

34 **Table S2.** Curve fitting results of XPS N 1s spectra.

|                                      | Peak                     | BE (eV) | FWHM (eV) | %    |
|--------------------------------------|--------------------------|---------|-----------|------|
| PAO                                  | -C≡N                     | 398.68  | 0.74      | 11.2 |
|                                      | N-H                      | 399.48  | 1.17      | 81.7 |
|                                      | -C(NH <sub>2</sub> )=NOH | 400.48  | 0.92      | 6.89 |
| K <sub>2</sub> FeO <sub>4</sub> @PAO | -C≡N                     | 398.72  | 0.69      | 7.54 |
|                                      | N-H                      | 399.41  | 1.18      | 81.6 |
|                                      | -C(NH <sub>2</sub> )=NOH | 400.38  | 0.99      | 10.8 |

35 **Table S3.** Curve fitting results of XPS O 1s spectra.

|                                      | Peak  | BE (eV) | FWHM (eV) | %    |
|--------------------------------------|-------|---------|-----------|------|
| PAO                                  | -COOH | 531.21  | 1.74      | 48.0 |
|                                      | C=O   | 532.16  | 1.06      | 33.8 |
|                                      | -OH   | 533.28  | 1.37      | 15.8 |
| K <sub>2</sub> FeO <sub>4</sub> @PAO | -COOH | 531.11  | 1.73      | 61.5 |
|                                      | C=O   | 532.28  | 1.42      | 24.7 |
|                                      | -OH   | 533.43  | 1.79      | 13.1 |

36

37 **Table S4.** Parameters for kinetic models of U(VI) adsorption on PAO and  
 38  $K_2FeO_4@PAO$  at  $pH\ 8.2 \pm 0.1$  and  $T = 298 \pm 1\ K$ .

|                | Pseudo first order |              |       | Pseudo second order |              |       |
|----------------|--------------------|--------------|-------|---------------------|--------------|-------|
|                | $k_1$ (1/h)        | $q_e$ (mg/g) | $R^2$ | $k_2$ (g/mg·h)      | $q_e$ (mg/g) | $R^2$ |
| PAO            | 0.697              | 9.37         | 0.990 | 0.0757              | 10.9         | 0.999 |
| $K_2FeO_4@PAO$ | 0.567              | 22.4         | 0.995 | 0.0230              | 26.9         | 0.998 |

39 **Table S5.** Parameters calculated from Langmuir and Freundlich models for U(VI)  
 40 adsorption on PAO and  $K_2FeO_4@PAO$  at  $pH\ 8.2 \pm 0.1$ .

|                | T (K) | Langmuir model   |          |       | Freundlich model |       |       |
|----------------|-------|------------------|----------|-------|------------------|-------|-------|
|                |       | $q_{max}$ (mg/g) | b (L/mg) | $R^2$ | K (mg/g)         | 1/n   | $R^2$ |
| PAO            | 298   | 78.4             | 0.0188   | 0.968 | 6.37             | 0.444 | 0.974 |
|                | 308   | 87.9             | 0.0230   | 0.944 | 8.98             | 0.410 | 0.969 |
|                | 318   | 99.3             | 0.0291   | 0.919 | 12.8             | 0.375 | 0.961 |
| $K_2FeO_4@PAO$ | 298   | 137              | 0.0342   | 0.944 | 12.8             | 0.448 | 0.836 |
|                | 308   | 138              | 0.0599   | 0.949 | 20.1             | 0.379 | 0.830 |
|                | 318   | 142              | 0.243    | 0.909 | 40.8             | 0.265 | 0.768 |

41 **Table S6.** Thermodynamic parameters for U(VI) adsorption on PAO and  
 42  $K_2FeO_4@PAO$  at  $pH\ 8.2 \pm 0.1$ .

|                | T (K) | $\ln K_d$ | Thermodynamic parameters  |                           |                            |
|----------------|-------|-----------|---------------------------|---------------------------|----------------------------|
|                |       |           | $\Delta G^\circ$ (KJ/mol) | $\Delta H^\circ$ (KJ/mol) | $\Delta S^\circ$ (J/mol·K) |
| PAO            | 298   | 7.16      | -17.5                     | 28.7                      | 155                        |
|                | 308   | 7.43      | -19.0                     |                           |                            |
|                | 318   | 7.89      | -20.6                     |                           |                            |
| $K_2FeO_4@PAO$ | 298   | 7.92      | -19.5                     | 70.2                      | 301                        |
|                | 308   | 8.51      | -22.5                     |                           |                            |
|                | 318   | 9.71      | -25.5                     |                           |                            |

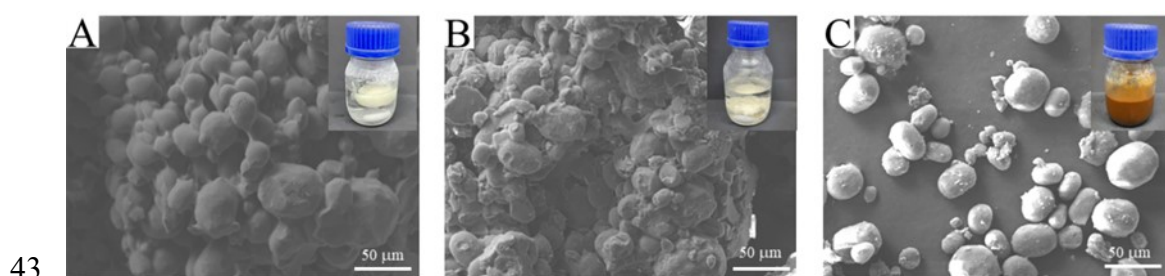

44 **Fig. S1.** SEM images of PAO in methanol/water (A), PAO in H<sub>2</sub>O (B),  
45 K<sub>2</sub>FeO<sub>4</sub>@PAO in H<sub>2</sub>O (C).

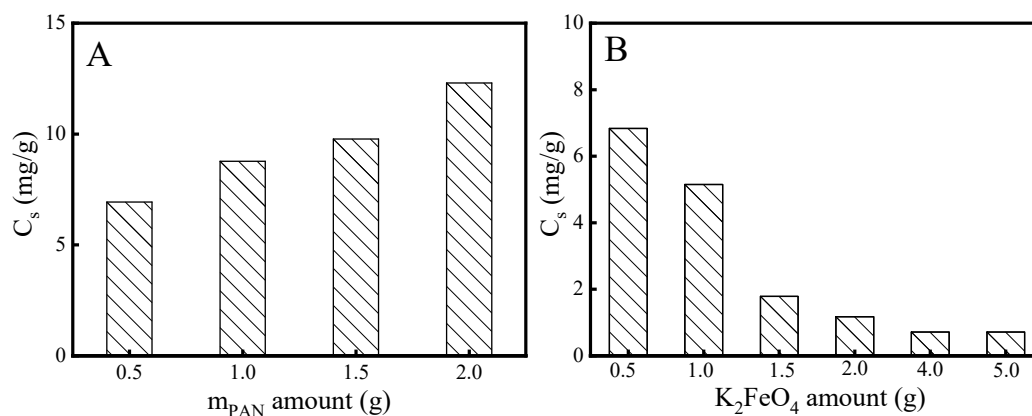

47 **Fig. S2.** Effect of used PAN (A) and K<sub>2</sub>FeO<sub>4</sub> (B) amounts on the adsorption  
48 performance of K<sub>2</sub>FeO<sub>4</sub>@PAO for U(VI). T = 298 ± 1 K, pH = 8.2 ± 0.1,  
49 C[U(VI)]<sub>initial</sub> = 10.0 mg/L, m/V = 0.4 g/L, I = 0.1 mol/L NaCl, contact time: 24 h.

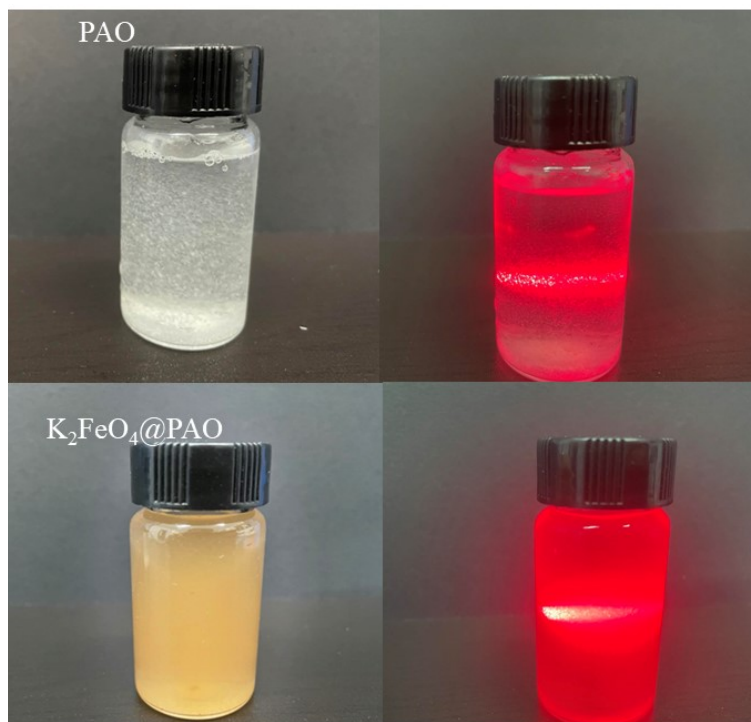

51 **Fig. S3** Comparison of the Tyndall phenomenon of PAO and K<sub>2</sub>FeO<sub>4</sub>@PAO.

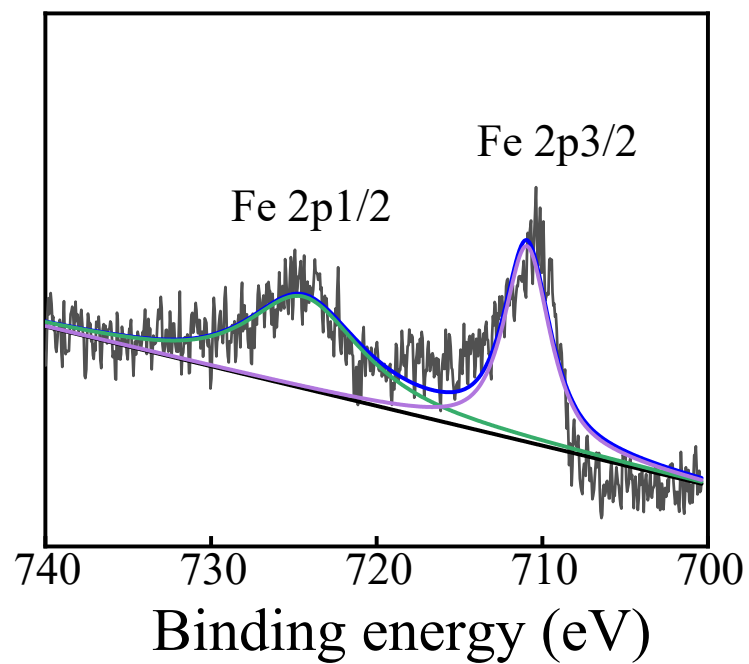

52

53 **Fig. S4.** XPS Fe 2p of  $\text{K}_2\text{FeO}_4@\text{PAO}$ .

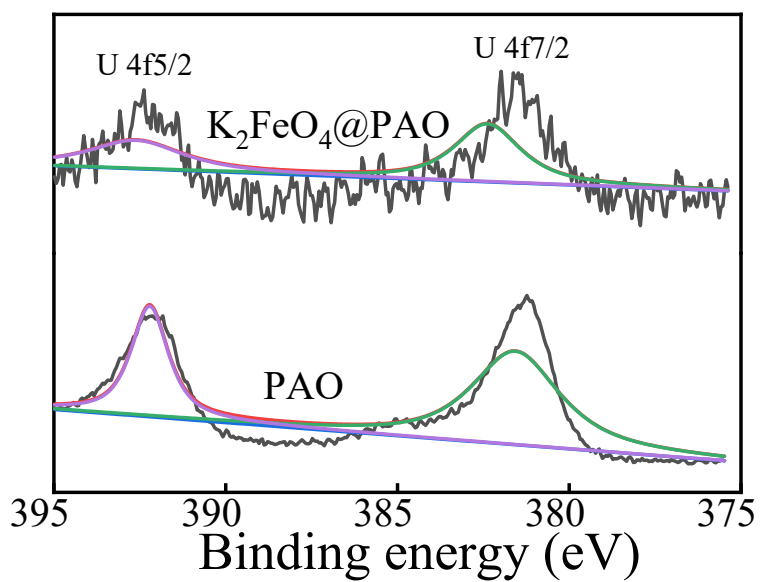

54

55 **Fig. S5.** XPS U 4f of PAO and  $\text{K}_2\text{FeO}_4@\text{PAO}$ .

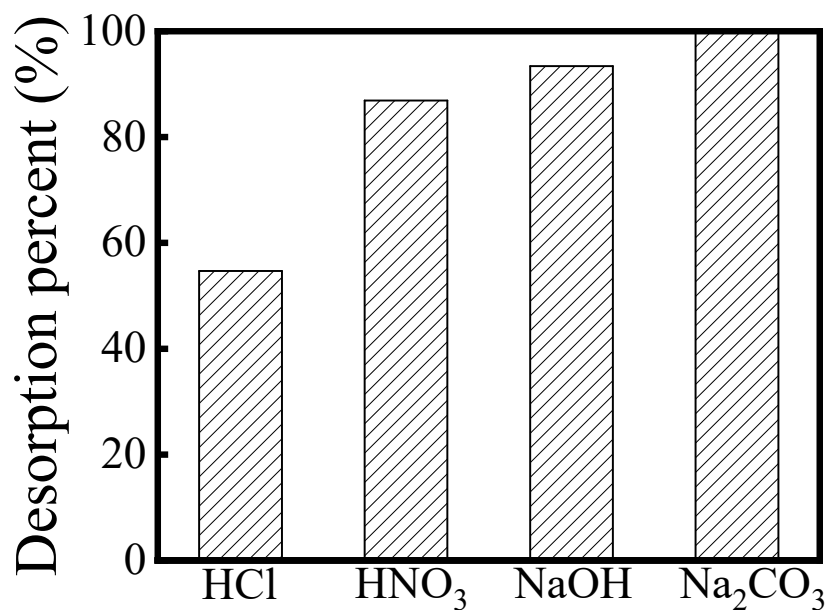

56

57 **Fig. S6.** Effect of solvents on the desorption of U(VI) from K<sub>2</sub>FeO<sub>4</sub>@PAO. I = 0.1  
 58 mol/L NaCl, T = 298 ± 1 K, contact time: 24 h. C[U(VI)]<sub>initial</sub> = 10.0 mg/L, m/V =  
 59 0.40 g/L, pH = 8.2 ± 0.1, the concentration of all desorption agents was 0.5 mol/L.

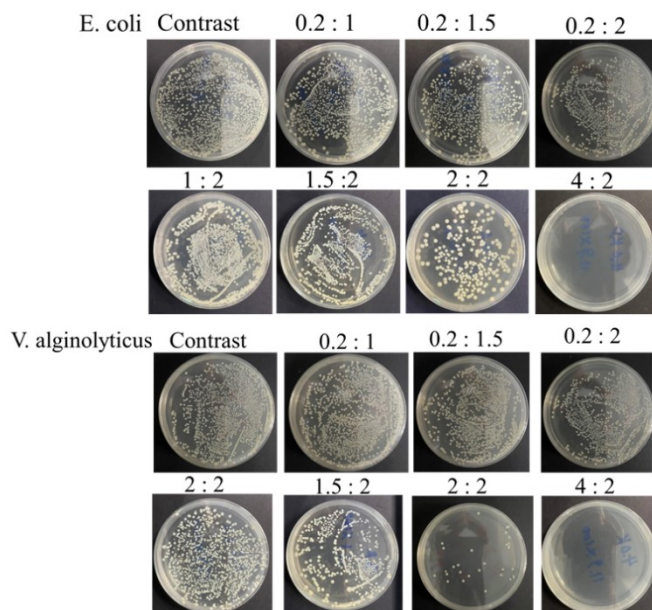

60

61 **Fig. S7.** The change colonies of *E. coli* and *V. alginolyticus* on agar plates at different  
 62 conditions. The K<sub>2</sub>FeO<sub>4</sub>@PAO materials were named according to the used amounts  
 63 of K<sub>2</sub>FeO<sub>4</sub> and PAN (Table 1).
